# Supplementary material
Source: HighWire-hosted journal article supplement (https://cse.ucpress.edu/content/suppl/2018/09/03/cse.2018.001214)
Supplement: cse.2018.001214-f3.docx [file cse.2018.001214-f3.docx]

**Workshop Agenda: Energy Poverty in a Carbon Constrained World**

9:00-9:45 Breakfast

Welcome and logistics

Introductions/ icebreaker

Pre-survey

*Short presentations from Michigan Energy experts—15 minutes plus 5 minutes for questions, attendees should treat this as a fact-finding mission for scenario building*

9:45-10:05 Utility regulation, energy as a public good, Janice Beecher, Institute of Public Utilities

10:05-10:25 Energy utility perspective, Anna Munie, Consumers Energy

10:25-10:45 Energy NGO perspective, John Sarver, Great Lakes Renewable Energy Association

10:45-11:45 Energy visioning exercise, small groups with experts, options for a low carbon energy future for Michigan

11:45-12:15 Break, lunch served (continue to eat during the talk)

12:15-1:00 Tools for the Ethical analysis of Energy (presenting the concepts of energy justice & deep energy security)

1:15-2:00 Active learning activity: energy around the world game & debrief

2:00-3:00 Domestic case study, Transitioning anthracite towns in Appalachia off of coal, break out groups

3:00-3:15 Break

3:15-4:15 International developing country case study, addressing energy poverty in Ethiopia, break out groups

4:15-5:15 Give-back session, discuss options for bringing this activity back to your community

5:15-5:30pm Post survey
